# Supplementary material for: Early season N 2 O emissions under variable water management in rice systems: source-partitioning emissions using isotope ratios along a depth profile
Source: Copernicus journal article supplement (doi:10.5194/bg-16-383-2019), 2019-01-24
Supplement: Supplementary file 1 [file bg-16-383-2019-supplement.zip]

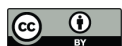

## *Supplement of*

# **Early season N<sub>2</sub>O emissions under variable water management in rice systems: source-partitioning emissions using isotope ratios along a depth profile**

**Elizabeth Verhoeven et al.**

*Correspondence to:* Elizabeth Verhoeven ([elizabeth.verhoeven@gmail.com](mailto:elizabeth.verhoeven@gmail.com))

- [bg-16-383-2019-supplement-title-page.pdf](#)
- [OpenSystemExcelTemplate.xlsx](#)
- [Supplementary\\_FINAL\\_v2.pdf](#)

The copyright of individual parts of the supplement might differ from the CC BY 4.0 License.
