# Supplementary material for: Early season N 2 O emissions under variable water management in rice systems: source-partitioning emissions using isotope ratios along a depth profile
Source: Copernicus journal article supplement (doi:10.5194/bg-16-383-2019), 2019-01-24
Supplement: Supplementary file 1 [file OpenSystemExcelTemplate.xlsx]

## Sheet: scenario 1
trmt	depth	plot	date_time_R	subN2ON_ug.L	SP_subsurface (meas.)	X18O_subsurface (meas.)	X15N_subsurface (meas.)		sc1 Knit	sc1 Kden	sc1 Kred	modeled N2O flux (Eq. 9)	modeled sc1 SP-N2O (Eq. 10)	modeled sc1 d18O-N2O (Eq. 11)	min SS
DS-AWD	5	1a	2016-05-20	66.9511	4.67	28.31	-28.56		10	100	80	30	11.6667	28.6333	1414.44
DS-AWD	5	1a	2016-05-20	66.9511	4.67	28.31	-28.56		10	10	10	10	34.8	36.5	4218.32
						Solver parameters and cell references for row 2					Solver parameters and cell references for row 3.
				Endmember values (Table 2)
				d18O-N2O(nit)	36.5
				d18O-N2O(den)	12.7
				SP(nit)	34.8
				SP(denit)	-3.9
				N2O_red(ɛSP)	-5
				N2O_red(ɛ18O)	-15

## Sheet: scenario 2
trmt	depth	plot	date_time_R	subN2ON_ug.L	SP_subsurface (meas.)	X18O_subsurface (meas.)	X15N_subsurface (meas.)		sc2 Knit	sc2 Kden	sc2 Kred	modeled N2O flux (Eq. 9)	modeled sc2 SP-N2O (Eq. 12)	modeled sc2 d18O-N2O (Eq. 13)	min SS
DS-AWD	5	1a	2016-05-20 12:00:00	66.9511	4.67	28.31	-28.56		10	100	80	30	1.57495	20.7339	1432.36
DS-AWD	5	1a	2016-05-20 12:00:00	66.9511	4.67	28.31	-28.56		10	10	10	10	3.71223	1.28669	3974.6
			Endmember values (Table 2)
			d18O-N2O(nit)	36.5
			d18O-N2O(den)	12.7
			SP(nit)	34.8
			SP(denit)	-3.9
			N2O_red(ɛSP)	-5
			N2O_red(ɛ18O)	-15
